# Supplementary material
Source: ML conference proceedings conference paper supplement (https://openreview.net/forum?id=0i0IjXuq6J5)
Supplement: supplementary_material [file attachment]

# Supplementary Material for “About contrastive unsupervised representation learning for classification and its convergence”

## A PROOFS FOR SECTION 3

Apart from the similarity between the unsupervised and supervised loss, the proof of Lemma 3.1 uses properties of log-sum-exp.

*Proof of Lemma 3.1* We first rewrite the unsupervised loss as:

$$L_{\text{un}}(f) = \mathbb{E}_{(x, x^+) \sim \mathcal{D}_{\text{sim}}, x^- \sim \mathcal{D}_{\text{neg}}} \log(1 + \exp(f(x)^T(f(x^-) - f(x^+))))$$

where we recognize the  $\zeta$  function  $\zeta(x) = \log(1 + e^x)$ . We start by using Jensen’s inequality

$$\begin{aligned} L_{\text{un}}(f) &= \mathbb{E}_{\substack{(x, x^+) \sim \mathcal{D}_{\text{sim}} \\ x^- \sim \mathcal{D}_{\text{neg}}}} [\zeta(f(x)^T(f(x^-) - f(x^+)))] \\ &\geq \mathbb{E}_{c, c^- \sim \rho, x \sim \mathcal{D}_c} [\zeta(f(x)^T(\mu_{c^-} - \mu_c))] \\ &\geq p_{\min}^\rho \mathbb{E}_{c \sim \rho, x \sim \mathcal{D}_c} \left[ \max_{c^-} \zeta(f(x)^T(\mu_{c^-} - \mu_c)) \right] \\ &= p_{\min}^\rho \mathbb{E}_{c \sim \rho, x \sim \mathcal{D}_c} \left[ \max_{c^-} \text{LSE}(0, f(x)^T(\mu_{c^-} - \mu_c)) \right] \\ &\geq p_{\min}^\rho \left( \mathbb{E}_{c \sim \rho, x \sim \mathcal{D}_c} \left[ \text{LSE}(f(x)^T(\mu_{c_1} - \mu_c), \dots, f(x)^T(\mu_{c_{N_C}} - \mu_c)) \right] - \log N_C \right) \\ &= p_{\min}^\rho (L_{\text{sup}}^\mu(f, \mathcal{C}) - \log N_C) \end{aligned}$$

where we have used properties of the log-sum-exp function

$$\max(x_1, \dots, x_n) \leq \text{LSE}(x_1, \dots, x_n) \leq \max(x_1, \dots, x_n) + \log n,$$

the fact that LSE is non-negative whenever one of its arguments is, and for  $x \in \mathbb{R}^{2n}$  we have

$$\text{LSE}(x) = \text{LSE}(\text{LSE}(x_1, x_2), \dots, \text{LSE}(x_{2n-1}, x_{2n})) \leq \max_{j=1, \dots, n} \text{LSE}(x_{2j-1}, x_{2j}) + \log n.$$

□

The proof of Lemma 3.2 considers the sample draws where all classes are represented.

*Proof of Lemma 3.2* Let  $I \in [N_C]^N$  the random vector of classes for each negative sample ( $I \sim \rho^{\otimes N}$ ) and let  $J$  be the set of represented classes i.e.  $J = \{I_j \mid j \in [N]\}$ . We have, again with Jensen’s inequality

$$\begin{aligned} L_{\text{un}}^N(f) &= \mathbb{E}_{x, x^+, x_1^-, \dots, x_N^-} [\text{LSE}(0, f(x)^T(f(x_1^-) - f(x^+)), \dots, f(x)^T(f(x_N^-) - f(x^+)))] \\ &\geq \mathbb{E}_{c \sim \rho, I \sim \rho^{\otimes N}, x \sim \mathcal{D}_c} [\text{LSE}(0, f(x)^T(\mu_{I_1} - \mu_c), \dots, f(x)^T(\mu_{I_N} - \mu_c))] \\ &\geq \mathbb{P}(|J| = N_C) \mathbb{E}_{\substack{I \sim \rho^{\otimes N} \\ x \sim \mathcal{D}_c}} [\text{LSE}(0, f(x)^T(\mu_{I_1} - \mu_c), \dots, f(x)^T(\mu_{I_N} - \mu_c)) \mid |J| = N_C] \\ &\geq \mathbb{P}(|J| = N_C) L_{\text{sup}}^\mu(f, \mathcal{C}), \end{aligned}$$

where we used that for  $\mathcal{S} \subset [n]$  and  $x \in \mathbb{R}^n$  we have  $\text{LSE}(x_{\mathcal{S}}) \leq \text{LSE}(x)$  with  $x_{\mathcal{S}}$  the restriction of  $x$  to the indices in  $\mathcal{S}$ . Finally, we have  $\mathbb{P}(|J| = N_C) = p_{cc}^\rho(N)$ . □

We restate Proposition 3.3 for cases  $N = 1$  and  $N > 1$ . The proof uses Jensen’s inequality and the uniformity of  $\rho$ .

**Proposition 3.3 (restated).** Consider the unsupervised loss  $L_{\text{un}}^N(f)$  from Equation (6) with  $N$  negative samples. Assume that  $\rho$  is uniform over  $\mathcal{C}$  and that  $2 \leq k+1 \leq N_{\mathcal{C}}$ . Then,

(1) any encoder function  $f : \mathcal{X} \rightarrow \mathbb{R}^d$  satisfies

$$L_{\text{sup},k}(f) \leq L_{\text{sup},k}^{\mu}(f) \leq \frac{k}{1-\tau^+} (L_{\text{un}}(f) - \tau^+)$$

with  $\tau^+ = \mathbb{P}_{c,c' \sim \rho^2} (c = c')$ , where  $L_{\text{un}}(f)$  is the unsupervised loss from Equation (6) with  $N = 1$  negative sample;

(2) more generally,

$$L_{\text{sup},k}(f) \leq L_{\text{sup},k}^{\mu}(f) \leq \frac{k}{1-\tau_N^+} (L_{\text{un}}^N(f) - \tau_N^+ \log(N+1))$$

with  $\tau_N^+ = \mathbb{P}(c_i = c, \forall i \mid c \sim \rho, (c_1, \dots, c_N) \sim \rho^N)$ , and where  $L_{\text{un}}^N(f)$  is the unsupervised loss from Equation (6).

*Proof of Proposition 3.3.* Let's start with (1). By Jensen's inequality, then use  $\log = \log_2$  without loss of generality, and split the expectation into cases  $c^- \neq c$  and  $c^- = c$ ,

$$\begin{aligned} L_{\text{un}}(f) &= \mathbb{E}_{(c,c^-) \sim \rho^2} \mathbb{E}_{x,x^+ \sim \mathcal{D}_c, x^- \sim \mathcal{D}_{c^-}} [\log(1 + \exp(f(x)^T (f(x^-) - f(x^+))))] \\ &\geq \mathbb{E}_{(c,c^-) \sim \rho^2, x \sim \mathcal{D}_c} [\log(1 + \exp(f(x)^T (\mu_{c^-} - \mu_c)))] \\ &= (1 - \tau^+) \mathbb{E}_{c \sim \rho, x \sim \mathcal{D}_c} \mathbb{E}_{c^- \sim \rho} [\log(1 + \exp(f(x)^T (\mu_{c^-} - \mu_c))) \mid c^- \neq c] + \tau^+. \end{aligned}$$

Let us write explicitly the uniform distribution  $\rho$  on  $\mathcal{C}$ . On the one hand,

$$\begin{aligned} &\mathbb{E}_{c^- \sim \rho} [\log(1 + \exp(f(x)^T (\mu_{c^-} - \mu_c))) \mid c^- \neq c] \\ &= \sum_{c^- \in \mathcal{C} \setminus \{c\}} \frac{1}{N_{\mathcal{C}} - 1} \log(1 + \exp(f(x)^T (\mu_{c^-} - \mu_c))), \end{aligned}$$

on the other hand,

$$\begin{aligned} &\mathbb{E}_{c_1, \dots, c_k \sim \rho^{\otimes k}} \left[ \sum_{i=1}^k \log(1 + \exp(f(x)^T (\mu_{c_i} - \mu_c))) \mid \{c, c_1, \dots, c_k\} \text{ distinct} \right] \\ &= \sum_{\substack{\{c_1, \dots, c_k\} \subseteq \mathcal{C} \setminus \{c\} \\ \{c_1, \dots, c_k\} \text{ distinct}}} \frac{1}{\binom{N_{\mathcal{C}} - 1}{k}} \sum_{i=1}^k \log(1 + \exp(f(x)^T (\mu_{c_i} - \mu_c))) \\ &= \frac{1}{\binom{N_{\mathcal{C}} - 1}{k}} \sum_{\substack{\{c_1, \dots, c_k\} \subseteq \mathcal{C} \setminus \{c\} \\ \{c_1, \dots, c_k\} \text{ distinct}}} \sum_{i=1}^k \log(1 + \exp(f(x)^T (\mu_{c_i} - \mu_c))). \end{aligned}$$

Consider a particular latent class  $c^- \in \mathcal{C} \setminus \{c\}$ , the term on  $c^-$  appears in the double sum for exactly  $\binom{N_{\mathcal{C}} - 2}{k - 1}$  times. And this is for every  $c^- \in \mathcal{C} \setminus \{c\}$ . We rearrange the double sum according to  $c^-$

$$\begin{aligned} &= \frac{1}{\binom{N_{\mathcal{C}} - 1}{k}} \binom{N_{\mathcal{C}} - 2}{k - 1} \sum_{c^- \in \mathcal{C} \setminus \{c\}} \log(1 + \exp(f(x)^T (\mu_{c^-} - \mu_c))) \\ &= k \sum_{c^- \in \mathcal{C} \setminus \{c\}} \frac{1}{N_{\mathcal{C}} - 1} \log(1 + \exp(f(x)^T (\mu_{c^-} - \mu_c))). \end{aligned}$$

Hence, using the uniformity of  $\rho$ ,

$$\begin{aligned} & \mathbb{E}_{c^- \sim \rho} [\log (1 + \exp (f(x)^T (\mu_{c^-} - \mu_c))) | c^- \neq c] \\ &= \frac{1}{k} \mathbb{E}_{c_1, \dots, c_k \sim \rho^{\otimes k}} \left[ \sum_{i=1}^k \log (1 + \exp (f(x)^T (\mu_{c_i} - \mu_c))) \middle| \{c, c_1, \dots, c_k\} \text{ distinct} \right] \\ &\geq \frac{1}{k} \mathbb{E}_{c_1, \dots, c_k \sim \rho^{\otimes k}} \left[ \log \left( 1 + \sum_{i=1}^k \exp (f(x)^T (\mu_{c_i} - \mu_c)) \right) \middle| \{c, c_1, \dots, c_k\} \text{ distinct} \right]. \end{aligned}$$

That means we have

$$\begin{aligned} L_{\text{un}}(f) &\geq \frac{1 - \tau^+}{k} \mathbb{E}_{\substack{c \sim \rho, x \sim \mathcal{D}_c \\ c_1, \dots, c_k \sim \rho^{\otimes k}}} \left[ \log \left( 1 + \sum_{i=1}^k \exp (f(x)^T (\mu_{c_i} - \mu_c)) \right) \middle| \{c, c_1, \dots, c_k\} \text{ distinct} \right] + \tau^+ \\ &= \frac{1 - \tau^+}{k} \mathbb{E}_{\mathcal{T} \sim \mathcal{D}^{k+1}} \mathbb{E}_{(x, c) \sim \mathcal{D}_{\mathcal{T}}} \left[ -\log \left( \frac{\exp(f(x)^T \mu_c)}{\exp(f(x)^T \mu_c) + \sum_{\substack{c^- \in \mathcal{T} \\ c^- \neq c}} \exp(f(x)^T \mu_{c^-})} \right) \right] + \tau^+ \\ &= \frac{1 - \tau^+}{k} L_{\text{sup}, k}^{\mu}(f) + \tau^+. \end{aligned}$$

As for (2), again by Jensen's inequality, and split the expectation into cases  $c_i^- = c, \forall i$  and  $\exists c_i^- \neq c$ ,

$$\begin{aligned} L_{\text{un}}^N(f) &= \mathbb{E}_{(c, c_i^-) \sim \rho^{N+1}} \mathbb{E}_{x, x^+ \sim \mathcal{D}_c, x_i^- \sim \mathcal{D}_{c_i^-}} \left[ \log \left( 1 + \sum_{i=1}^N \exp (f(x)^T (f(x_i^-) - f(x^+))) \right) \right] \\ &\geq \mathbb{E}_{(c, c_i^-) \sim \rho^{N+1}, x \sim \mathcal{D}_c} \left[ \log \left( 1 + \sum_{i=1}^N \exp (f(x)^T (\mu_{c_i^-} - \mu_c)) \right) \right] \\ &= (1 - \tau_N^+) \mathbb{E}_{\substack{x \sim \mathcal{D}_c \\ c_i^- \sim \rho^N}} \left[ \log \left( 1 + \sum_{i=1}^N \exp (f(x)^T (\mu_{c^-} - \mu_c)) \right) \middle| \exists c_i^- \neq c \right] + \tau_N^+ \log(N+1) \end{aligned}$$

with

$$\tau_N^+ = \mathbb{P}(c_i = c, \forall i \mid c \sim \rho, c_i \sim \rho^N) = \sum_{c \in \mathcal{C}} \rho(c)^{N+1} = N_{\mathcal{C}}^{-N}.$$

Considering the fact that

$$\begin{aligned} & \mathbb{E}_{c_i^- \sim \rho^N} \left[ \log \left( 1 + \sum_{i=1}^N \exp (f(x)^T (\mu_{c^-} - \mu_c)) \right) \middle| \exists c_i^- \neq c \right] \geq \\ & \mathbb{E}_{c^- \sim \rho} [\log (1 + \exp (f(x)^T (\mu_{c^-} - \mu_c))) | c^- \neq c], \end{aligned}$$

then by similar computations as in (1), we have

$$L_{\text{un}}^N(f) \geq \frac{1 - \tau_N^+}{k} L_{\text{sup}, k}^{\mu}(f) + \tau_N^+ \log(N+1).$$

□

## B PROOFS FOR SECTION 4

Let us first prove that under Assumption 2, the objective is gradient-Lipschitz w.r.t. the network outputs.

**Lemma 4.1.** Consider the unsupervised loss  $\ell$  given by (11), grant Assumption 2 and define the set

$$B^3 = \left\{ z = (z_1, z_2, z_3) \in (\mathbb{R}^d)^3 : \max_{j=1,2,3} \|z_j\|_2^2 \leq C^2 \right\}$$

where  $C > 0$  is defined in Assumption 2. Then, the restriction of  $\ell$  to  $B^3$  satisfies (12) with a constant  $L_{\text{smooth}} \leq 2 + 8C^2$ .

*Proof.* We will prove this result by bounding the norm of the Hessian matrix.

Let us write the gradient of  $\ell(z)$  with respect to  $z$  first. We have  $z \in \mathbb{R}^{3d}$ . For ease of writing, we define the matrices  $A_1, A_2, A_3 \in \mathbb{R}^{3d \times d}$  as

$$A_1 = \begin{pmatrix} I_d \\ 0_d \\ 0_d \end{pmatrix} \quad A_2 = \begin{pmatrix} 0_d \\ I_d \\ 0_d \end{pmatrix} \quad A_3 = \begin{pmatrix} 0_d \\ 0_d \\ I_d \end{pmatrix}$$

where  $I_d, 0_d \in \mathbb{R}^{d \times d}$  are the identity and zero matrix respectively. With this notation, we have  $z_i = A_i^T z$  for  $i = 1, 2, 3$  the three contiguous thirds of  $z$ 's coordinates.

Our purpose is to compute

$$\frac{\partial}{\partial z} \ell(z) = \frac{\partial}{\partial z} \left[ -\log \left( \frac{\exp(z_1^T z_2)}{\exp(z_1^T z_2) + \exp(z_1^T z_3)} \right) \right].$$

Denote  $\cos_{i,j} = z_i^T z_j$ , we can now compute for  $i, j \in \{1, 2, 3\}$  ( $i \neq j$ )

$$\frac{\partial}{\partial z} \cos_{i,j} = (A_i A_j^T + A_j A_i^T) z =: \partial \cos_{i,j} \in \mathbb{R}^{3d}.$$

Now, denote  $v = \text{softmax}(\cos_{1,2}, \cos_{1,3}) \in \mathbb{R}^2$ , we can write

$$\frac{\partial}{\partial z} \ell(z) = (v_1 - 1) \partial \cos_{1,2} + v_2 \partial \cos_{1,3}.$$

We proceed with the following computation

$$\frac{\partial^2}{\partial z^2} \cos_{i,j} = A_i A_j^T + A_j A_i^T,$$

which we will denote simply as  $\partial^2 \cos_{i,j}$ . Before we get the Hessian of loss, we still need to compute

$$\partial v := \frac{\partial v}{\partial z} = (\text{diag}(v) - v v^T) \begin{pmatrix} \partial \cos_{1,2}^T \\ \partial \cos_{1,3}^T \end{pmatrix} \in \mathbb{R}^{2 \times 3d}.$$

Now we can write

$$\frac{\partial^2}{\partial z^2} \ell(z) = (v_1 - 1) \partial^2 \cos_{1,2} + v_2 \partial^2 \cos_{1,3} + (\partial \cos_{1,2} \quad \partial \cos_{1,3}) \partial v.$$

We can now estimate the norm of this matrix which will provide an estimation for the Lipschitz constant.

We find that

$$\|\partial \cos_{i,j}\| \leq 2 \max(\|z_i\|, \|z_j\|),$$

keeping in mind that the matrix  $\text{diag}(v) - v v^T$  has norm at most  $1/2$ , this leads to

$$\|(\partial \cos_{1,2} \quad \partial \cos_{1,3}) \partial v\| = 8 \max_{i,j} (\|z_i\| \|z_j\|).$$

We have also that  $\|\partial^2 \cos_{i,j}\| = 1$ .

All in all, we have  $\left\| \frac{\partial^2}{\partial z^2} \ell(z) \right\| = 2 + 8 \max_{i,j} (\|z_i\| \|z_j\|)$ . Recalling that we restricted  $\mathbb{R}^{3d}$  so that we have  $\max_i \|z_i\| \leq C$  the result follows.  $\square$

Theorem 1 is actually obtained in two steps. First, Theorem 6 from [Allen-Zhu et al. \(2019\)](#) allows us to obtain that the gradient of the objective  $\nabla \hat{L}_{\text{un}}(f)$  with respect to the network outputs reaches arbitrarily low values. Then, combining this with Assumption 2 this result can be extended into the objective itself.

Following appendix A of [Allen-Zhu et al. \(2019\)](#), we need to define the loss vectors for our model. These are originally defined as  $\text{loss}_i = y_i - y_i^*$  ( $y_i$  and  $y_i^*$  are respectively the output and label corresponding to an input  $x_i$  from the dataset) for the  $\ell^2$  loss. More generally, for a network output  $z_i$ , they are defined as

$$\text{loss}_i = \nabla_z \ell(z_i).$$

Following the unsupervised training protocol, samples are fed into the network three at a time  $x, x^+$  and  $x^-$ . Let us denote  $\theta$  the parameters of the network  $f$ , for a triplet  $(x_i, x_i^+, x_i^-)$ , the trick is to write:

$$\frac{\partial}{\partial \theta} \ell(z_i) = \frac{\partial z}{\partial \theta} \underbrace{\frac{\partial}{\partial z} \ell(z_i)}_{\text{loss}}$$

with  $z_i$  the concatenation of  $f(x_i), f(x_i^+), f(x_i^-)$ .

By denoting  $(x_1, x_2, x_3) = (x_i, x_i^+, x_i^-)$ , the previous writing is equivalent to

$$\sum_{j=1}^3 \frac{\partial f(x_j)}{\partial \theta} A_j^T \frac{\partial}{\partial z} \ell(z_i)$$

and by letting  $\text{loss}_{i,j} = A_j^T \frac{\partial}{\partial z} \ell(z_i)$ , we obtain a triplet of loss vectors for each data triplet (matrices  $A_j$  defined in the previous proof).

**Lemma B.1.** Grant Assumption [1](#) and let  $\hat{L}_{\text{un}}(f)$  be the loss incurred by  $f$ :

$$\hat{L}_{\text{un}}(f) = \sum_{i=1}^n \ell(f(x_i), f(x_i^+), f(x_i^-))$$

and let  $\epsilon > 0$  be the desired precision. Then, assuming  $m \geq \Omega(\text{poly}(n, L, \delta^{-1}) \cdot d\epsilon^{-1})$ , the gradient descent with learning rate  $\nu = \Theta\left(\frac{d\delta}{\text{poly}(n, L) \cdot m}\right)$  finds parameters such that

$$\|\nabla \hat{L}_{\text{un}}(f)\| \leq \epsilon$$

after a number of steps  $T = O\left(\frac{\text{poly}(n, L)}{\delta^2 \epsilon^2}\right)$ .

*Proof.* This result follows from [Allen-Zhu et al. \(2019\)](#) (see Theorem 6 and appendix A). It corresponds to the case of a non-convex bounded loss function. We only need to check the used loss function  $\ell$  is bounded and gradient-Lipschitz smooth. The latter condition is verified due to Lemma [4.1](#) and Assumption [2](#).

As for the boundedness, it is also a consequence of Assumption [2](#) and the fact that the softplus function satisfies

$$\zeta(x) \sim^{x \rightarrow +\infty} x \quad \text{and} \quad \lim_{x \rightarrow -\infty} \zeta(x) = 0.$$

□

From here, we can derive a result for the objective itself (Theorem [1](#) thanks to the following Lemma.

**Lemma 4.2.** Grant Assumption [2](#) and assume that the parameters of the encoder  $f$  are optimized so that  $\|\nabla \hat{L}_{\text{un}}(f)\| \leq \epsilon$  with  $\epsilon < \eta/2$ , where  $\eta$  is defined in Assumption [2](#). Then, for any  $i = 1, \dots, n$ , we have  $\ell(z_i) \leq 2\epsilon/\eta$  where  $z_i = (f(x_i), f(x_i^+), f(x_i^-))$ .

*Proof.* Since we assume  $\|\nabla \hat{L}_{\text{un}}(f)\| \leq \epsilon$ , this also implies that  $\max_{i,j} \|\text{loss}_{i,j}\| \leq \epsilon$  (see Theorem 3 of [Allen-Zhu et al. \(2019\)](#) and its variant in appendix A).

We can write the norms  $\|\text{loss}_{i,j}\|$  as:

$$\begin{aligned} \|\text{loss}_{i,1}\| &= \|(v_1 - 1)z_{i,2} + v_2 z_{i,3}\| \\ \|\text{loss}_{i,2}\| &= |v_1 - 1| \|z_{i,1}\| \\ \|\text{loss}_{i,3}\| &= v_2 \|z_{i,1}\| \end{aligned}$$

where we defined  $v = \text{softmax}(z_1^T z_2, z_1^T z_3)$ .

Thanks to Assumption 2 we can argue that  $\|z_{i,j}\| \geq \eta$ . These quantities can be small for  $v_1 \rightarrow 1$  and  $v_2 \rightarrow 0$ . Since we have  $\max_{i,j} \|\text{loss}_{i,j}\| \leq \epsilon$ , this implies in particular that for all  $i$  we get  $\|\text{loss}_{i,3}\| \leq \epsilon$  which means  $v_2 \leq \epsilon/\eta$ , and we have  $v_2 = \sigma(z_1^T(z_3 - z_2))$ . So for an instance  $i \in [n]$  the loss term in the objective is:

$$\begin{aligned} \zeta(z_{i,1}^T(z_{i,3} - z_{i,2})) &= \log(1 + \exp(z_{i,1}^T(z_{i,3} - z_{i,2}))) \\ &= -\log(\sigma(-z_{i,1}^T(z_{i,3} - z_{i,2}))) \\ &= -\log(1 - \sigma(z_{i,1}^T(z_{i,3} - z_{i,2}))) \\ &= -\log(1 - v_2) \leq \frac{v_2}{1 - v_2} \leq 2v_2 \leq 2\epsilon/\eta, \end{aligned}$$

where we used the inequality  $-\log(1 - x) \leq \frac{x}{1-x}$  for  $0 \leq x < 1$ , and the assumption that  $\epsilon < \eta/2$ .  $\square$

Lemma 4.2 allows us to deduce that the objective is well optimized (we treated the loss term for a single triplet here but the same methods can be applied to the whole objective with a number of gradient steps which is still polynomial).

*Proof of Theorem 1* Theorem 1 is the consequence of combining Lemma B.1 applied using  $\frac{\epsilon\eta}{2n}$  instead of  $\epsilon$  and Lemma 4.2 (the  $1/n$  factor can be absorbed by the  $\text{poly}(n, L)$  factors in the bounds of Lemma B.1).  $\square$
